# Supplementary material
Source: PubMed Central journal article supplement (PMC7188359)
Supplement: NIHMS1530113-supplement-1.pdf [file NIHMS1530113-supplement-1.pdf]

**Table S1: Baseline characteristics of the total CHS cohort at year 1996-1997, as well as the subgroups with and without serum uromodulin measurement**

|                                           | Total Cohort (n=4413) | Group without sUMOD measurement (n=3480) | Random Subcohort with sUMOD measured (n=933) | p-value |
|-------------------------------------------|-----------------------|------------------------------------------|----------------------------------------------|---------|
| <b>Demographics</b>                       |                       |                                          |                                              |         |
| Age (ys)                                  | 78.6 (4.8)            | 78.7 (5.2)                               | 78.1 (4.8)                                   | <0.001  |
| Male                                      | 38.3                  | 38.0                                     | 39.7                                         | 0.4     |
| Race Black                                | 16.7                  | 17.1                                     | 15.3                                         | 0.2     |
| Site                                      |                       |                                          |                                              | 0.1     |
| Wake Forest                               | 26.0                  | 26.8                                     | 23.2                                         |         |
| UC Davis                                  | 26.4                  | 25.9                                     | 28.5                                         |         |
| Johns Hopkins                             | 21.3                  | 21.1                                     | 21.8                                         |         |
| Pittsburgh                                | 26.3                  | 26.2                                     | 26.6                                         |         |
| <b>Laboratory Measures</b>                |                       |                                          |                                              |         |
| eGFR <60 ml/min/1.73 m <sup>2</sup>       | 43.2                  | 43.7                                     | 41.7                                         | 0.3     |
| eGFR (ml/min per 1.73 m <sup>2</sup> )    | 63.0 (18.6)           | 62.8 (18.6)                              | 63.4 (18.6)                                  | 0.4     |
| Albuminuria (ACR>30 mg/g Cr)              | 654 (21.0)            | 481 (21.2)                               | 173 (20.5)                                   | 0.7     |
| (log <sub>2</sub> ) ACR (mg/g)            | 3.8 (1.9)             | 3.8 (1.9)                                | 3.8 (1.9)                                    | 0.9     |
| Fasting glucose (mg/dl)                   | 106.6 (32.3)          | 106.3 (31.4)                             | 107.4 (34.6)                                 | 0.4     |
| (log <sub>2</sub> ) CRP (mg/dl)           | 1.3 (1.6)             | 1.3 (1.6)                                | 1.3 (1.6)                                    | 0.4     |
| Total cholesterol (mg/dl)                 | 202.0 (39.7)          | 202.2 (40.0)                             | 201.4 (38.8)                                 | 0.6     |
| Serum albumin (g/dl)                      | 3.8 (0.3)             | 3.8 (0.3)                                | 3.8 (0.3)                                    | 0.7     |
| <b>CVD risk factors and prevalent CVD</b> |                       |                                          |                                              |         |
| Systolic BP (mmHg)                        | 136.9 (20.7)          | 136.9 (20.6)                             | 137.0 (21.0)                                 | 0.9     |
| Diastolic BP (mmHg)                       | 69.8 (11.3)           | 69.9 (11.4)                              | 69.8 (11.0)                                  | 0.8     |
| BMI (kg/m <sup>2</sup> )                  | 26.9 (4.7)            | 26.9 (4.7)                               | 26.9 (4.7)                                   | 0.8     |
| Diabetes mellitus                         | 17.2                  | 18.4                                     | 13.8                                         | 0.06    |
| Hypertension                              | 65.0                  | 66.5                                     | 60.0                                         | <0.001  |
| Heart Failure                             | 11.0                  | 11.4                                     | 9.2                                          | 0.06    |
| Cardiovascular Disease                    | 18.7                  | 19.0                                     | 17.5                                         | 0.3     |
| <b>Lifestyle factors</b>                  |                       |                                          |                                              |         |
| Smoking                                   |                       |                                          |                                              | 0.08    |
| Current                                   | 7.7                   | 7.8                                      | 7.4                                          |         |
| Former                                    | 44.6                  | 45.4                                     | 41.6                                         |         |
| Never                                     | 47.7                  | 46.8                                     | 51.0                                         |         |

Continuous variables in mean (SD=standard deviation), categorical variables in percentage of total population. Cardiovascular Disease is defined as history of myocardial infarction and/or stroke prior to baseline assessment. Abbreviations: sUMOD=serum uromodulin, eGFR=estimated glomerular filtration rate, CRP=C-reactive protein, ACR=albumin/creatinine ratio, CVD=cardiovascular disease, Cr=creatinine, BP=blood pressure, BMI=body mass index.

**Table S2: Baseline characteristics of participants from the random subcohort with an eGFR measurement available at 2005-2006 visit, compared to the remaining patients that returned to this visit**

|                                                     | Total Cohort (n=1876) | Patients not from the random subcohort (n=1596) | Patients from the random subcohort (n=280) | p-value |
|-----------------------------------------------------|-----------------------|-------------------------------------------------|--------------------------------------------|---------|
| <b>Demographics</b>                                 |                       |                                                 |                                            |         |
| Age at baseline (ys)                                | 76.8 (3.9)            | 76.8 (3.9)                                      | 76.5(3.8)                                  | 0.1     |
| Age at follow-up (ys)                               | 85.7 (3.8)            | 85.7 (3.9)                                      | 85.4 (3.8)                                 | 0.2     |
| Male                                                | 33.2                  | 32.3                                            | 37.9                                       | 0.08    |
| Race Black                                          | 17.4                  | 17.9                                            | 14.6                                       | 0.2     |
| Site                                                |                       |                                                 |                                            | 0.08    |
| Wake Forest                                         | 24.3                  | 25.3                                            | 18.6                                       |         |
| UC Davis                                            | 28.3                  | 37.5                                            | 32.5                                       |         |
| Johns Hopkins                                       | 19.3                  | 19.0                                            | 20.7                                       |         |
| Pittsburgh                                          | 28.1                  | 28.1                                            | 28.2                                       |         |
| <b>Laboratory Measures</b>                          |                       |                                                 |                                            |         |
| eGFR <60 ml/min/1.73 m <sup>2</sup> at baseline     | 31.7                  | 32.1                                            | 30.0                                       | 0.5     |
| eGFR at baseline (ml/min per 1.73 m <sup>2</sup> )  | 68.3 (16.6)           | 68.2 (16.5)                                     | 68.6 (17.2)                                | 0.7     |
| eGFR at follow-up (ml/min per 1.73 m <sup>2</sup> ) | 60.5 (19.6)           | 60.2 (19.2)                                     | 61.3 (20.6)                                | 0.5     |
| Albuminuria at baseline (ACR>30 mg/g Cr)            | 12.0                  | 12.6                                            | 8.9                                        | 0.1     |
| (log <sub>2</sub> ) ACR (mg/g)                      | 3.3 (1.6)             | 3.3 (1.5)                                       | 3.3 (1.6)                                  | 0.9     |
| Fasting glucose (mg/dl)                             | 103.7 (27.0)          | 103.6 (26.4)                                    | 104.0 (28.8)                               | 0.8     |
| (log <sub>2</sub> ) CRP (mg/dl)                     | 1.2 (1.5)             | 1.2 (1.5)                                       | 1.2 (1.5)                                  | 0.5     |
| Total cholesterol (mg/dl)                           | 204.2 (37.7)          | 204.2 (37.8)                                    | 204.3 (37.1)                               | 1.0     |
| Serum albumin (g/dl)                                | 3.8 (0.3)             | 3.8 (0.3)                                       | 3.8 (0.3)                                  | 0.5     |
| <b>CVD risk factors and prevalent CVD</b>           |                       |                                                 |                                            |         |
| Systolic BP (mmHg)                                  | 136.0 (19.7)          | 136.0 (19.6)                                    | 136.0 (20.2)                               | 1.0     |
| Diastolic BP (mmHg)                                 | 70.2 (10.9)           | 70.0 (10.9)                                     | 71.0 (10.8)                                | 0.2     |
| BMI (kg/m <sup>2</sup> )                            | 27.3 (4.5)            | 27.3 (4.5)                                      | 27.4 (4.5)                                 | 0.8     |
| Diabetes mellitus                                   | 21.5                  | 22.5                                            | 16.6                                       | 0.05    |
| Hypertension                                        | 62.3                  | 63.4                                            | 56.8                                       | 0.05    |
| Heart Failure                                       | 3.7                   | 3.3                                             | 5.7                                        | 0.07    |
| Cardiovascular Disease                              | 10.4                  | 10.5                                            | 10.0                                       | 0.9     |
| <b>Lifestyle factors</b>                            |                       |                                                 |                                            |         |
| Smoking                                             |                       |                                                 |                                            | 0.9     |
| Current                                             | 7.3                   | 7.3                                             | 6.9                                        |         |
| Former                                              | 40.7                  | 40.9                                            | 40.0                                       |         |
| Never                                               | 52.0                  | 51.8                                            | 53.1                                       |         |

Continuous variables in mean (SD=standard deviation), categorical variables in percentage of total population. Cardiovascular Disease is defined as history of myocardial infarction and/or stroke prior to baseline assessment. Abbreviations: sUMOD=serum uromodulin, eGFR=estimated glomerular filtration rate, CRP=C-reactive protein, ACR=albumin/creatinine ratio, CVD=cardiovascular disease, Cr=creatinine, BP=blood pressure, BMI=body mass index.

**Table S3: Associations of serum uromodulin with kidney function decline  $\geq 40\%$**

|                                                   | Cases/<br>Controls | Univariate       | Plus adjusted<br>for<br>demographics <sup>b</sup> | Plus adjusted<br>for eGFR and<br>ACR <sup>c</sup> | Plus adjusted for CVD<br>RF and prevalent<br>disease <sup>d</sup> |
|---------------------------------------------------|--------------------|------------------|---------------------------------------------------|---------------------------------------------------|-------------------------------------------------------------------|
| <b>Odds ratio per SD<sup>a</sup> higher sUMOD</b> | 92/311             | 0.76 (0.59-0.99) | 0.82 (0.63-1.08)                                  | 0.94 (0.71-1.25)                                  | 0.98 (0.73-1.33)                                                  |

Kidney function decline is defined a reduction of estimated glomerular filtration rate  $\geq 40\%$  from baseline (1996-1997) for the follow-up visit (2005-2006). 95%-confidence intervals for the hazards ratios are given in parentheses. Abbreviations: SD=standard deviation; eGFR=estimated glomerular filtration rate; ACR=urinary albumin/creatinine-ratio; RF=risk factors.

<sup>a</sup> SD=63.9 ng/ml

<sup>b</sup> adjusted for age, sex, race, clinic site, body-mass index, level of education

<sup>c</sup> adjusted for <sup>b</sup> + eGFR & (log<sub>2</sub>) ACR

<sup>d</sup> adjusted for <sup>c</sup> + diabetes, smoking status, systolic blood pressure, serum cholesterol, (log<sub>2</sub>) serum C-reactive protein, lipid-lowering medication, antihypertensive medication, prevalent heart failure and cardiovascular disease (CVD) at baseline
